# Supplementary material for: Determinants of pro-environmental behavior among excessive smartphone usage children and moderate smartphone usage children in Taiwan
Source: PeerJ. 2021 Jun 18;9:e11635. doi: 10.7717/peerj.11635 (PMC8216169; doi:10.7717/peerj.11635)
Supplement: Supplemental Information 1 — This study specifically sought to measure three key dimensions: (1) perceived behavioral control, (2) personal norms, and (3) social norms that were considered influential to pro-environmental behavior. This research adopted the self-administered questionnaire survey method, which comprised of background and psychological variables developed according to the three key dimensions identified earlier. Overall results showed that both males (48.9%, n = 110) and females (51.1%, n = 115) were relatively well represented in this study. [file peerj-09-11635-s001.xlsx]

## Sheet: Norm_behavior_data
number	student_grade	gender(1=male, 2=female)	Smartphone usage(1= Excessive; 2 = Moderate)	PBC1	PBC2	PBC3	PBC4	PN1	PN2	PN3	SN1	SN2	SN3	SN4	SN5	PEB1	PEB2	PEB3	PEB4	PEB5
1	5	1	1	5	5	5	5	5	5	1	5	5	1	2	2	5	1	5	5	5
2	5	2	2	3	5	5	5	5	5	3	5	5	5	5	5	5	5	3	4	5
3	5	1	1	3	3	3	3	3	3	4	3	3	3	3	3	3	3	3	3	3
4	5	1	1	3	3	4	4	4	4	4	4	3	3	3	3	3	3	2	2	2
5	5	1	1	5	5	5	3	2	3	1	2	3	1	1	1	2	5	1	1	1
6	5	2	1	3	5	5	5	5	2	3	5	5	5	1	5	3	5	4	3	3
7	5	1	2	3	3	3	5	3	5	4	3	3	3	3	5	3	3	3	3	3
8	5	1	2	5	5	5	5	5	5	5	5	5	5	5	5	1	5	5	5	5
9	5	1	2	5	2	2	5	5	5	5	5	5	5	5	5	2	5	1	4	1
10	5	2	1	5	3	5	5	5	5	5	2	2	1	2	1	3	5	3	5	2
11	5	2	2	3	3	4	4	4	3	3	4	3	3	3	3	4	4	3	4	3
12	5	2	1	3	2	3	4	2	2	2	3	3	3	3	3	3	3	3	3	3
13	5	2	1	3	3	3	3	3	3	3	3	3	3	3	2	3	3	3	3	3
14	5	1	2	4	4	4	4	4	4	3	4	4	4	4	3	5	5	3	5	5
15	5	1	2	1	4	4	3	4	4	4	4	4	4	4	1	1	3	2	2	2
16	5	1	2	5	5	5	5	5	5	4	2	3	5	4	5	5	5	5	4	5
17	5	2	2	4	3	3	3	3	2	3	5	5	3	3	3	1	1	1	1	1
18	5	2	2	3	3	3	4	3	3	4	3	3	4	3	4	3	3	3	3	3
19	5	2	2	2	2	4	4	4	5	2	5	3	2	5	3	1	1	1	5	2
20	5	2	2	3	4	4	4	4	5	4	3	3	2	3	2	3	3	3	4	3
21	5	2	2	4	3	3	3	3	4	3	2	2	3	3	3	3	2	3	4	4
22	5	2	2	4	4	4	4	5	4	1	3	5	1	5	5	5	2	2	5	2
23	5	2	2	1	4	2	1	2	1	3	4	4	4	4	4	1	1	1	2	1
24	5	1	2	1	5	5	3	5	3	4	1	1	1	5	5	2	5	3	5	3
25	5	1	1	1	4	3	3	3	3	5	3	5	4	4	3	3	3	1	2	1
26	5	2	2	4	4	3	4	4	5	5	4	4	4	4	4	4	4	4	4	4
27	5	2	1	4	4	5	3	3	3	5	3	5	3	2	1	3	4	2	1	3
28	5	2	2	4	4	4	4	4	5	3	4	3	2	4	3	3	3	4	3	3
29	5	1	1	3	3	5	4	5	3	4	5	5	1	3	4	1	3	2	2	2
30	5	1	1	4	3	5	3	3	2	3	2	4	3	5	4	3	3	1	1	2
31	5	1	2	3	3	3	3	3	3	3	3	3	3	3	3	3	3	3	3	3
32	5	2	2	4	5	5	5	5	5	3	3	3	5	5	5	1	5	5	5	5
33	5	2	1	3	4	5	4	2	4	3	3	2	3	5	3	5	1	1	3	3
34	5	2	1	4	4	3	3	5	4	3	3	4	3	4	3	3	3	3	4	2
35	5	2	2	5	5	5	5	5	5	5	4	4	4	4	4	3	5	4	4	3
36	5	2	2	5	5	5	5	5	5	5	3	3	3	5	5	4	5	4	4	4
37	5	2	2	5	3	4	5	5	5	5	5	5	5	5	5	5	5	3	5	5
38	5	1	2	3	3	5	3	5	5	3	3	3	3	3	3	3	3	3	3	3
39	5	1	2	5	5	1	4	5	2	5	5	4	4	4	5	1	1	1	4	5
40	5	2	1	3	5	5	5	3	3	5	5	4	5	4	5	4	5	3	3	4
41	5	2	1	3	4	4	3	2	4	2	3	3	1	3	3	1	1	1	2	1
42	5	2	2	2	2	3	3	3	3	3	3	3	2	3	2	2	3	2	3	2
43	5	2	1	1	3	5	3	3	5	3	3	3	3	3	3	3	5	3	2	1
44	5	2	2	3	3	3	3	3	3	3	3	3	3	3	3	3	3	3	3	3
45	5	1	2	3	3	5	3	5	4	3	4	4	3	4	4	3	3	3	3	4
46	5	1	2	5	3	5	4	3	3	3	5	5	5	3	1	3	2	1	2	1
47	5	1	2	3	3	4	4	3	3	4	3	3	3	3	3	4	4	3	4	3
48	5	2	2	5	5	5	5	5	5	5	4	4	4	4	4	5	5	1	5	5
49	5	2	2	5	3	5	5	5	5	5	3	4	3	3	3	5	5	5	5	5
50	5	2	2	3	2	4	5	2	5	5	5	5	5	5	2	5	5	3	5	5
51	5	1	2	2	2	3	2	3	3	3	3	2	2	2	1	3	2	1	3	2
52	5	1	1	3	4	5	4	4	3	4	3	4	3	4	3	3	4	5	5	3
53	5	1	1	5	3	5	4	3	5	3	1	3	1	4	3	4	3	4	2	3
54	5	1	1	3	3	4	4	4	4	4	3	3	4	5	4	4	5	3	5	3
55	5	1	2	2	4	4	3	4	4	3	3	4	4	3	2	3	3	3	4	3
56	5	2	1	3	3	5	5	3	5	3	2	3	3	5	4	4	3	3	4	3
57	6	2	1	3	4	4	4	4	5	5	5	5	5	5	5	3	3	3	3	3
58	6	1	1	3	3	3	3	3	3	3	3	3	3	3	3	3	3	3	3	3
59	6	1	2	3	3	4	3	4	3	3	4	4	2	4	3	5	5	3	5	3
60	6	1	1	4	1	2	3	2	1	1	3	3	3	3	3	3	3	3	3	3
61	6	1	1	3	3	3	3	3	3	3	3	4	4	4	3	3	3	3	3	3
62	6	1	2	4	5	5	5	5	5	5	5	5	5	5	5	5	5	5	5	5
63	6	2	2	3	3	4	5	4	4	2	3	2	2	5	1	1	4	1	4	3
64	6	1	1	3	3	3	3	3	3	3	3	3	3	3	3	3	3	3	3	3
65	6	1	1	2	1	1	1	1	5	2	2	2	1	2	2	1	1	3	5	5
66	6	1	1	5	3	5	4	3	3	3	3	3	3	3	3	3	5	3	2	2
67	6	1	1	2	3	3	4	3	3	3	3	3	3	3	3	3	3	3	3	3
68	6	1	1	3	4	5	4	4	5	3	3	3	3	3	3	4	5	2	4	3
69	6	1	1	4	3	5	5	5	3	3	5	5	5	5	5	4	2	3	3	3
70	6	1	1	5	1	5	5	4	5	1	4	5	4	4	5	4	4	5	4	3
71	6	2	2	3	4	4	4	4	4	4	4	4	4	4	4	3	3	3	3	3
72	6	2	1	5	3	5	4	5	1	1	5	5	5	5	5	5	5	5	5	5
73	6	2	1	3	3	4	4	3	4	3	3	4	4	4	4	3	4	3	3	3
74	6	2	2	5	5	5	5	5	5	5	5	5	5	5	5	5	5	5	5	5
75	6	2	1	2	3	2	2	3	4	4	3	3	3	3	3	3	3	3	3	2
76	6	1	2	2	2	2	3	3	3	2	3	3	3	3	3	1	2	1	3	1
77	6	1	1	1	1	1	5	5	5	1	5	3	1	5	1	1	1	1	1	1
78	6	1	2	2	3	3	3	2	3	3	2	2	2	3	2	3	3	3	3	3
79	6	1	2	4	4	5	4	3	3	2	3	2	4	3	5	5	2	2	3	5
80	6	1	2	4	4	4	4	4	4	4	3	3	3	3	3	4	4	3	2	3
81	6	1	2	3	3	3	3	3	4	3	3	3	3	3	3	3	3	3	4	3
82	6	2	2	4	4	4	4	4	4	4	3	3	3	4	4	4	4	4	4	3
83	6	2	1	5	2	5	4	4	4	3	4	4	1	5	4	2	5	1	4	3
84	6	2	2	2	5	3	2	3	3	4	1	1	1	1	1	3	3	3	3	3
85	6	2	2	4	2	4	4	4	4	4	4	4	3	4	3	4	3	3	4	3
86	6	2	2	3	2	3	3	2	3	3	3	3	3	3	3	3	3	3	4	3
87	6	2	2	3	2	3	3	4	3	3	3	3	1	3	2	1	1	2	2	1
88	6	1	2	4	4	4	4	5	5	4	5	4	4	5	3	4	3	4	4	4
89	6	1	1	3	3	2	3	5	2	2	5	3	3	2	3	4	5	4	4	3
90	6	1	2	3	3	5	3	1	1	5	4	5	1	5	3	2	5	1	3	1
91	6	2	1	2	4	4	4	4	4	3	4	4	2	4	3	4	4	3	3	4
92	6	2	1	3	4	5	3	3	3	3	3	5	3	5	3	3	4	4	4	3
93	6	2	1	2	2	2	4	5	5	3	5	5	2	3	2	2	3	3	2	2
94	6	1	1	3	3	4	3	4	3	4	4	3	3	3	3	2	2	1	1	1
95	6	1	2	5	5	5	4	5	5	5	5	5	5	5	3	5	5	5	5	5
96	6	1	1	3	3	3	4	1	3	4	2	3	3	4	2	3	3	1	2	2
97	6	1	2	5	3	3	5	5	5	5	5	5	2	5	5	4	4	2	5	3
98	6	2	1	3	3	5	4	4	4	3	5	5	5	5	3	4	3	4	2	3
99	6	2	2	5	4	5	5	4	4	5	4	5	5	4	5	5	5	5	5	5
100	6	1	1	3	4	5	3	4	4	5	3	4	3	3	5	3	4	3	2	2
101	6	1	1	1	1	1	2	1	1	1	3	3	1	3	1	1	1	1	1	1
102	6	1	2	3	3	3	3	3	3	3	3	3	3	3	3	3	3	2	4	2
103	6	1	2	3	3	3	3	3	3	3	3	3	3	3	3	3	3	3	3	3
104	6	1	2	3	4	4	4	4	4	3	3	3	1	3	3	3	3	3	4	3
105	6	1	1	3	3	4	3	5	4	3	3	3	2	3	2	3	3	3	5	2
106	6	1	2	3	2	4	3	4	3	3	4	4	2	4	3	3	2	2	3	2
107	6	2	1	3	3	4	3	3	4	4	3	4	3	4	4	3	4	3	4	2
108	6	2	1	4	4	4	4	3	3	4	4	3	2	3	3	2	4	2	4	2
109	6	2	1	2	1	3	4	5	5	4	5	4	1	4	4	2	2	1	1	1
110	6	1	2	3	3	4	3	3	3	3	3	3	3	3	1	3	3	3	3	3
111	6	1	2	2	4	5	5	5	5	4	5	5	2	5	3	2	3	2	4	1
112	6	1	1	2	2	3	4	3	3	4	4	5	3	5	3	3	5	3	2	3
113	6	1	1	3	3	4	3	4	4	2	4	4	4	4	3	4	4	3	3	3
114	6	1	2	4	5	5	4	3	4	4	2	2	1	4	1	4	2	3	5	4
115	6	2	2	3	3	4	4	4	5	3	3	5	3	5	3	4	4	3	4	3
116	6	2	2	3	3	5	3	5	5	4	4	4	4	4	3	4	4	3	3	3
117	6	2	2	5	3	4	4	5	5	1	5	5	2	5	4	2	3	2	5	4
118	6	2	2	2	1	3	5	4	5	3	4	5	3	5	3	3	4	1	2	5
119	6	2	2	3	3	3	5	4	5	3	4	2	1	2	3	3	5	1	4	3
120	6	2	2	4	4	5	5	5	5	4	4	4	4	4	3	5	3	4	4	3
121	6	1	1	5	3	5	3	4	3	4	3	3	3	3	3	3	3	1	3	2
122	6	1	1	5	3	5	3	5	5	5	4	4	4	4	1	5	5	3	4	4
123	6	1	1	3	3	3	3	3	3	3	4	4	4	4	4	3	3	3	3	3
124	6	2	1	4	3	4	4	3	4	3	3	4	3	4	3	3	4	3	3	3
125	6	2	1	3	3	4	3	3	3	3	3	3	3	3	3	3	4	3	2	2
126	6	2	1	5	2	3	4	3	3	3	3	4	3	3	3	3	3	4	3	3
127	6	2	2	5	4	5	4	4	4	5	4	3	3	3	5	5	5	3	4	3
128	6	2	2	5	4	5	5	5	4	4	4	5	5	5	5	5	5	5	5	5
129	5	1	1	3	3	3	3	3	3	3	3	3	3	3	3	3	3	3	3	3
130	5	1	1	5	5	5	5	5	5	5	5	5	5	5	1	1	1	1	1	1
131	5	2	1	3	3	3	3	3	3	3	3	3	3	3	3	5	5	5	5	5
132	5	2	2	5	5	5	5	5	5	5	1	1	1	1	1	5	5	5	5	5
133	5	2	1	3	3	3	3	3	3	3	3	3	3	3	3	3	3	3	1	3
134	5	2	2	4	5	5	5	5	5	2	1	1	1	4	1	5	4	3	2	4
135	5	1	1	1	5	1	5	5	5	5	5	5	5	1	1	1	5	1	1	5
136	5	1	2	3	3	3	3	3	3	3	3	3	3	3	3	3	3	3	3	3
137	5	1	1	3	2	2	4	2	4	4	4	4	4	4	4	4	2	2	4	4
138	5	1	1	1	5	3	3	5	5	3	5	5	5	5	5	5	4	4	1	5
139	5	2	1	4	4	4	5	3	3	2	5	5	4	5	5	5	4	3	2	5
140	5	2	1	3	3	3	4	3	2	3	3	3	3	3	3	3	3	3	3	3
141	5	2	1	4	3	4	4	2	3	2	2	5	4	3	2	3	5	4	5	5
142	5	1	2	5	4	5	4	3	4	4	4	5	5	5	5	4	5	3	5	3
143	5	1	2	4	4	4	4	4	4	4	4	4	4	4	4	3	3	3	3	3
144	5	1	1	3	2	2	3	5	5	4	4	3	3	4	2	3	3	3	3	3
145	5	1	2	3	3	4	4	3	4	3	4	4	3	3	3	3	3	3	3	3
146	5	2	2	5	3	5	5	5	3	3	3	3	3	3	3	5	4	4	5	5
147	5	2	2	3	3	3	3	3	3	3	5	5	5	5	5	3	4	3	5	3
148	5	2	2	2	2	3	4	3	4	3	3	3	2	4	2	3	2	3	3	3
149	5	2	1	3	2	5	5	2	2	2	3	3	1	3	2	1	3	1	1	1
150	5	1	2	3	3	2	3	4	3	3	3	3	3	3	2	3	3	3	3	3
151	5	2	2	5	3	5	5	5	5	5	5	5	5	5	5	3	5	3	5	3
152	5	2	2	5	5	5	5	5	5	3	5	5	3	5	5	5	5	5	5	5
153	5	1	2	3	3	3	3	3	3	3	3	3	3	3	3	3	3	3	3	3
154	5	1	2	5	5	5	5	5	5	5	5	5	1	5	5	5	5	5	5	5
155	5	2	2	5	5	5	5	5	5	5	5	5	5	5	5	5	5	5	5	5
156	5	1	2	1	2	2	2	3	3	2	3	2	3	2	2	2	2	4	2	3
157	5	1	2	3	2	2	4	2	2	3	2	3	2	4	3	2	2	1	2	3
158	5	1	2	3	4	4	4	5	3	3	4	3	4	3	3	3	3	3	3	3
159	5	1	2	3	3	5	3	4	5	5	5	5	3	3	5	3	5	2	5	1
160	5	1	1	3	3	5	3	3	2	2	4	5	4	3	3	3	5	3	4	4
161	5	2	2	4	3	3	4	3	4	4	4	4	3	4	4	3	4	3	4	3
162	5	2	2	2	3	3	3	4	5	3	5	4	4	5	3	5	5	5	5	5
163	5	1	2	4	1	5	3	3	3	3	3	5	4	5	4	5	5	5	5	5
164	5	1	1	2	3	4	4	3	3	3	3	3	3	3	2	2	3	2	3	2
165	5	1	2	3	5	5	5	5	5	3	5	5	3	2	1	5	5	5	3	3
166	5	1	2	1	5	5	5	5	3	3	5	5	5	5	5	3	5	5	5	5
167	5	1	1	1	1	5	3	1	3	5	3	3	1	5	1	1	5	1	5	5
168	5	2	2	3	3	3	3	1	3	2	1	3	2	3	2	3	3	3	4	3
169	5	2	2	3	5	3	5	5	5	3	5	5	5	5	5	5	3	2	5	3
170	5	2	2	5	5	5	5	5	5	5	5	5	5	5	5	1	5	3	5	3
171	5	2	2	5	5	5	5	3	3	5	5	3	3	4	3	5	5	5	5	5
172	5	2	1	5	5	5	5	5	5	5	5	5	5	5	5	5	5	5	5	5
173	5	2	2	4	3	4	3	3	4	3	5	5	4	3	3	3	3	3	3	3
174	5	2	2	5	4	5	5	5	5	5	5	5	3	5	5	5	4	3	5	4
175	5	2	2	5	5	5	5	5	5	5	5	5	5	5	5	5	5	5	5	5
176	5	1	1	5	5	5	4	5	5	5	4	3	5	4	3	5	4	4	5	3
177	5	1	1	4	4	3	3	3	4	3	3	3	4	4	3	4	3	3	3	4
178	5	2	2	5	5	5	5	5	5	5	5	5	5	5	5	5	5	3	5	5
179	5	2	2	3	5	5	5	5	5	5	5	5	5	5	5	4	5	5	5	5
180	6	1	1	5	5	4	3	3	5	5	4	4	3	5	5	5	5	5	3	5
181	6	2	1	3	4	4	4	4	3	3	2	3	2	4	2	2	3	2	3	2
182	6	2	1	1	1	4	2	3	2	2	3	3	3	3	3	3	3	3	3	3
183	6	1	2	5	5	5	5	5	5	5	5	5	5	5	5	5	5	5	5	5
184	6	1	1	2	2	5	5	2	3	2	2	3	1	2	1	2	4	2	4	1
185	6	1	1	5	4	3	3	3	5	4	2	5	5	5	5	5	5	4	5	4
186	6	2	1	3	3	3	1	4	3	1	3	3	3	3	3	1	1	1	1	1
187	6	2	2	3	3	3	3	3	3	3	4	4	3	4	3	3	3	3	3	3
188	6	2	2	4	4	4	4	4	4	4	3	4	3	4	4	2	4	3	4	3
189	6	2	2	3	4	5	5	5	5	5	5	5	5	5	3	5	5	5	5	5
190	6	2	2	4	4	5	5	5	5	5	5	5	4	3	3	5	5	3	4	3
191	6	2	1	5	5	5	5	4	3	3	2	5	5	5	5	5	5	5	5	5
192	6	1	1	2	2	4	4	3	3	3	3	3	3	3	3	3	3	3	3	3
193	6	1	2	4	4	5	2	3	4	5	3	4	3	2	2	2	2	2	3	3
194	6	1	2	3	3	4	4	4	4	4	4	4	3	4	3	4	4	3	3	3
195	6	2	1	3	4	5	4	4	4	3	4	3	2	4	3	3	3	3	3	2
196	6	2	1	4	3	4	1	3	4	4	3	3	3	4	2	3	4	4	4	2
197	6	2	2	3	3	4	4	4	4	4	3	4	2	5	3	3	4	1	5	2
198	6	2	2	1	3	3	3	4	4	3	3	3	3	3	3	2	3	2	3	2
199	6	1	2	4	4	5	4	5	5	5	5	5	5	5	5	5	5	4	5	4
200	6	1	1	1	1	1	1	1	1	5	1	5	1	5	1	4	3	4	1	1
201	6	2	2	4	3	4	4	4	3	3	3	4	4	4	3	4	4	3	4	3
202	6	2	1	2	3	2	3	2	2	3	2	3	1	3	5	3	3	2	3	2
203	6	1	2	5	3	5	5	3	4	4	3	5	2	5	1	5	5	3	5	5
204	6	1	2	3	5	4	4	3	4	3	3	4	3	5	3	3	4	3	4	5
205	6	2	2	3	4	5	4	3	3	3	4	4	2	4	3	3	3	2	3	2
206	6	2	1	3	2	3	3	3	4	3	3	5	3	4	2	4	5	3	4	3
207	6	2	1	3	3	4	4	3	4	4	2	3	2	4	4	4	5	3	5	4
208	6	2	2	3	2	3	3	4	5	3	3	3	3	3	3	3	3	3	3	3
209	6	2	1	5	3	3	5	3	5	3	3	3	5	3	1	5	4	5	1	3
210	6	1	2	2	2	2	3	2	3	3	3	3	3	3	4	3	2	1	4	1
211	6	1	1	1	2	2	2	2	2	2	2	2	2	2	2	2	2	2	2	2
212	6	1	1	2	3	4	4	3	2	4	2	4	2	4	4	2	4	3	2	3
213	6	1	2	4	5	5	5	4	5	5	5	5	5	4	2	4	4	2	5	3
214	6	2	2	4	4	5	5	4	4	3	4	4	4	4	3	4	3	3	4	3
215	6	2	2	3	4	4	4	5	5	3	4	4	4	4	3	4	4	4	4	3
216	6	2	2	3	2	3	2	3	2	2	4	4	2	4	2	2	2	2	3	2
217	6	2	2	2	3	4	4	4	4	2	4	4	4	4	4	4	4	2	4	3
218	6	2	2	4	3	3	3	3	2	2	4	4	4	3	4	3	3	3	4	3
219	6	1	2	4	5	5	4	5	5	5	5	5	5	5	1	5	5	5	5	5
220	6	2	2	3	3	4	4	4	3	3	4	4	3	4	3	3	4	3	4	3
221	6	1	1	3	3	4	4	3	4	3	2	2	2	3	4	4	4	3	5	3
222	6	1	2	5	5	5	5	5	4	3	4	5	3	4	3	4	5	3	3	3
223	6	1	2	3	3	4	4	4	4	3	5	5	5	5	4	5	4	4	3	3
224	6	1	1	4	3	5	3	4	4	5	4	5	5	5	3	5	5	4	3	3
225	6	2	1	4	2	4	4	2	4	2	4	4	2	4	2	2	3	2	4	2
